CORRECTION

# Correction: Identification of soil P fractions that are associated with P loss from surface runoff under various cropping systems and fertilizer rates on sloped farmland

Xinghua Li, Baona Wang, Tewu Yang, Duanwei Zhu, Zhongnan Nie, Junchi Xu

In the Funding and Acknowledgements section, the grant number from the funder National Key Research and Development Program of China is listed incorrectly. The correct grant number is: 2017YFD0800102.

## Reference

1. Li X, Wang B, Yang T, Zhu D, Nie Z, Xu J (2017) Identification of soil P fractions that are associated with P loss from surface runoff under various cropping systems and fertilizer rates on sloped farmland. PLoS ONE 12(6): e0179275. <https://doi.org/10.1371/journal.pone.0179275> PMID: 28650990

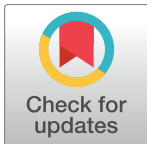

## OPEN ACCESS

**Citation:** Li X, Wang B, Yang T, Zhu D, Nie Z, Xu J (2018) Correction: Identification of soil P fractions that are associated with P loss from surface runoff under various cropping systems and fertilizer rates on sloped farmland. PLoS ONE 13(1): e0191753. <https://doi.org/10.1371/journal.pone.0191753>

**Published:** January 19, 2018

**Copyright:** © 2018 Li et al. This is an open access article distributed under the terms of the [Creative Commons Attribution License](https://creativecommons.org/licenses/by/4.0/), which permits unrestricted use, distribution, and reproduction in any medium, provided the original author and source are credited.
